# Supplementary material
Source: PubMed Central journal article supplement (PMC8103735)
Supplement: mmc1.pdf [file mmc1.pdf]

## Online supplementary material

### Non-Marketing Authorized Compassionate Prescription Request Form in the COVID-19 indication

|                                                                             |                                                                    |
|-----------------------------------------------------------------------------|--------------------------------------------------------------------|
| <b>Patient:</b><br><b>Name:</b><br><b>Surname:</b><br><b>Date of birth:</b> | <b>Requesting unit:</b><br><b>Requesting name:</b><br><b>Date:</b> |
|-----------------------------------------------------------------------------|--------------------------------------------------------------------|

**Drug requested (name, international non-proprietary name, dose, route of administration, and duration):**

**Scientific rationale on which the indication is based (at least 1 reference):**

**Clinical presentation of the patient justifying the drug (context, severity, prognosis, comorbidities, etc.):**

*The generable admissible criteria:*

|                                                         |          |
|---------------------------------------------------------|----------|
| Inclusion in clinical trial not permitted:              | yes - no |
| Oximetry pulse $\leq$ 94% with more than 6L/min oxygen: | yes - no |
| Favourable long-term prognosis in case of recovery:     | yes - no |

**Efficacy and tolerance of monitoring methods (clinical, paraclinical, and frequency):**

**Collegial decision procedures in the unit:**

Name and rank of the physicians who participated to the decision-making

**Information, traceability:**

|                                                                                      |         |
|--------------------------------------------------------------------------------------|---------|
| Patient's information (or trusted person)(rational, exceptional delivery, and risks) | yes- no |
| Have these elements been traced in the medical record?:                              | yes- no |

**Committee's decision: Date:**      Favourable    Non favourable

*To be completed by the compassionate treatment committee*

**Monitoring elements:**

|                                              |                                                  |                                              |                               |
|----------------------------------------------|--------------------------------------------------|----------------------------------------------|-------------------------------|
| Day 7: Return home <input type="checkbox"/>  | Non ICU hospitalization <input type="checkbox"/> | ICU hospitalization <input type="checkbox"/> | dead <input type="checkbox"/> |
| Adverse events: .....                        |                                                  |                                              |                               |
| Day 14: Return home <input type="checkbox"/> | Non ICU hospitalization <input type="checkbox"/> | ICU hospitalization <input type="checkbox"/> | dead <input type="checkbox"/> |
| Adverse events: .....                        |                                                  |                                              |                               |
